# Supplementary material
Source: publisher site journal article supplement (https://www.dovepress.com/get_supplementary_file.php?f=266220-1.xlsx)
Supplement: Supplementary file 1 [file get_supplementary_file.php]

## Sheet: Patient
	Supplementary File 1
PATIENT-REPORTED VARIABLES IN THE CHICO COHORT
Construct	Item content	Response options	Questionnaire	Variable code	BL 1	BL 2	FU 2W	FU 3M	FU 12M	Skip logics and data preparation
					x = Questionnare i = Interview
Identification	Record ID			record_id	x
	Clinic ID			clinic_id	x					Calculated field, using record_id
	If I am selected for an interview, a researcher may call me:	0, No | 1, Yes		key_consentcontact	x
Demographic and social factors	Age at time of inclusion			key_age	x					Calculated field, using CPR
	Sex	1, Male | 2, Female		key_sex	x					Calculated field, using CPR
	How tall are you (cm)			height_p0		x
	What is your weight (kg)			weight_p0		x
	BMI			bmi_p0		x				Calculated field; using height and weight
	Do you smoke?	1, Yes | 0, No, I never smoke | 2, No, I have stopped smoking		smoker_p0		x
	How much do you smoke on average per day: Number of cigarettes?			cigarette_p0		x				Item skipped unless smoker_p0="1, Yes"
	How much do you smoke on average per day: Number of cheroots?			cerut_p0		x				Item skipped unless smoker_p0="1, Yes"
	How much do you smoke on average per day: Number of cigars?			cigar_p0		x				Item skipped unless smoker_p0="1, Yes"
	How much do you smoke on average per day: Number of pibe fills?			pipe_p0		x				Item skipped unless smoker_p0="1, Yes"
	Do you live with a spouse / partner?	0, No | 1, Yes		cohab_p0		x
	How many children are there in the household?	0, 0 | 1, 1 | 2, 2 | 3, 3 or more		childhome_p0		x
	My spouse / partner understands my back situation	1, Strongly disagree | 2, Disagree | 3, Neutral | 4, Agree | 5, Strongly agree		partsupp1_p0		x				Item skipped unless cohab_p0="1, Yes". Recoded as ".a" if cohab_p0="0, No"
	My spouse / partner helps me at home whenmy back aches	1, Strongly disagree | 2, Disagree | 3, Neutral | 4, Agree | 5, Strongly agree		partsupp2_p0		x				Item skipped unless cohab_p0="1, Yes". Recoded as ".a" if cohab_p0="0, No"
	My spouse / partner supports my decisions	1, Strongly disagree | 2, Disagree | 3, Neutral | 4, Agree | 5, Strongly agree		partsupp3_p0		x				Item skipped unless cohab_p0="1, Yes". Recoded as ".a" if cohab_p0="0, No"
	What is your highest education?	0, No completed education | 1, primary school (9th or 10th grade) | 2, Youth Education (High school etc.) | 3, Vocational education (eg shop assistant, hairdresser, mason) | 4, Short further education 2-3 Years (eg Laboratory or machine Technician, Multimedia Designer, Police Officer) | 5, Middle further education 3-4 years (eg, primary school teacher, building designer, nurse, physiotherapist, b…		edu_p0		x
	Do you have a job at the moment? (Answer "Yes" also if you are reported sick from your work)	0, No | 1, Yes		job_p0	x
	What is your present main job?	1, Self-emplyed| 2, Employed Spouse | 3, Employee with personnel responsibilities | 4, Employee | 5, House wife / House husband | 6, Student | 7, Job training | 8, Light duties' job, flexjob | 9, Conscripted | 10, Apprentice | 11, Other | 12, Not at work		mainjob_p0		x
	What is your job title?			mainjobtx_p0		x				Item skipped unless mainjob_p0="11, other".
	If not working, are you	1, Long-term sick leave or rehabilitation | 2, On leave | 3, Unemployed on unemployment benefits | 4, Unemployed on social security | 5, On early retirement or retired | 6, Other		nojob_p0		x				Item skipped unless mainjob_p0="12, not at work".
	What is your weekly working time including extra work and second jobs			workhours_p0		x				Item skipped if mainjob_p0="12, not at work". Recoded as missing if workhours_p0>90
	How many days of sick leave have you had within the last 3 months due to low back pain?			sickleave_p0		x				Item skipped if mainjob_p0="12, not at work". Recoded as ".a" if mainjob_p0="12, not at work". Recoded as missing if sickleave_p0>91
	How many days of sick leave have you had within the last 2 weeks due to low back pain?			sickleave_p2		x	x			Recoded as missing if sickleave_p2>14
	How many days of sick leave have you had within the last month due to low back pain?			sickleave_p13		x		x, i	x, i	Interview data merged with questionnaire data. Recoded as missing if sickleave_p>31
	Are you still on sick leave?	0, No | 1, Yes		sickleavepres_p0		x	x	x, i	x, i	Interview data merged with questionnaire data. Item skipped unless sickleave>0
	How would you describe the total physical strain caused by your work?	1, Very light | 2, Light | 3, Somewhat strenuous | 4, Strenuous | 5, Very strenuous		workload_p0		x				Item skipped if mainjob_p0="12, not at work". Recoded as ".a" if mainjob_p0="12, not at work"
	How often do you lift, carry or move loads that are light (1-7 kg)?	1, Never | 2, rarely | 3, Sometimes | 4, Often | 5, Very often		worklifts1_p0		x				Item skipped if mainjob_p0="12, not at work". Recoded as ".a" if mainjob_p0="12, not at work"
	How often do you lift, carry or move loads of middle weight (8-30 kg)?	1, Never | 2, rarely | 3, Sometimes | 4, Often | 5, Very often		worklifts2_p0		x				Item skipped if mainjob_p0="12, not at work". Recoded as ".a" if mainjob_p0="12, not at work"
	How often do you lift, carry or move loads that are heavy (more than 30 kg)?	1, Never | 2, rarely | 3, Sometimes | 4, Often | 5, Very often		worklifts3_p0		x				Item skipped if mainjob_p0="12, not at work". Recoded as ".a" if mainjob_p0="12, not at work"
	How often does your work imply sitting down?	1, Never | 2, rarely | 3, Sometimes | 4, Often | 5, Very often		workpos1_p0		x				Item skipped if mainjob_p0="12, not at work". Recoded as ".a" if mainjob_p0="12, not at work"
	How often does your work imply standing?	1, Never | 2, rarely | 3, Sometimes | 4, Often | 5, Very often		workpos2_p0		x				Item skipped if mainjob_p0="12, not at work". Recoded as ".a" if mainjob_p0="12, not at work"
	How often does your work imply squatting?	1, Never | 2, rarely | 3, Sometimes | 4, Often | 5, Very often		workpos3_p0		x				Item skipped if mainjob_p0="12, not at work". Recoded as ".a" if mainjob_p0="12, not at work"
	How often does your work imply kneeling down on one or both knees?	1, Never | 2, rarely | 3, Sometimes | 4, Often | 5, Very often		workpos4_p0		x				Item skipped if mainjob_p0="12, not at work". Recoded as ".a" if mainjob_p0="12, not at work"
	How often does your work imply walking / moving around?	1, Never | 2, rarely | 3, Sometimes | 4, Often | 5, Very often		workpos5_p0		x				Item skipped if mainjob_p0="12, not at work". Recoded as ".a" if mainjob_p0="12, not at work"
	How would you rate the overall appreciation and recognition you receive at your workplace for your efforts?	0, No recognition 0 | 1, 1 | 2, 2 | 3, 3 | 4, 4 | 5, 5 | 6, 6 | 7, 7 | 8, 8 | 9, 9 | 10, Full recognition 10		workappre_p0		x				Item skipped if mainjob_p0="12, not at work". Recoded as ".a" if mainjob_p0="12, not at work"
	If you assess your work in total (management, salary, development opportunities and work colleagues) how satisfied are you with your work?	0, Not satisfied 0 | 1, 1 | 2, 2 | 3, 3 | 4, 4 | 5, 5 | 6, 6 | 7, 7 | 8, 8 | 9, 9 | 10, Fully satisfied 10		worksat_p0		x				Item skipped if mainjob_p0="12, not at work". Recoded as ".a" if mainjob_p0="12, not at work"
	Imagine your ability to work is worth 10 points at its best. How many points will you give your current work ability?	0, 0 | 1, 1 | 2, 2 | 3, 3 | 4, 4 | 5, 5 | 6, 6 | 7, 7 | 8, 8 | 9, 9 | 10, 10		workcap_p0		x			x	Item skipped if mainjob_p0="12, not at work". Recoded as ".a" if mainjob_p0="12, not at work"
General Health	How would you categorize your health all in all?	1, Excellent | 2, Very fine | 3, Fine | 4, Fair | 5, Bad		genhealth_p0		x
	In addition to LBP, did you within the last 2 weeks experience headache?	1, Yes		comorhead_p0		x
	In addition to LBP, did you within the last 2 weeks experience pain in the neck?	1, Yes		comorneck_p0		x
	In addition to LBP, did you within the last 2 weeks experience chest pain ?	1, Yes		comorchest_p0		x
	In addition to LBP, did you within the last 2 weeks experience pain in the stomach?	1, Yes		comorstom_p0		x
	In addition to LBP, did you within the last 2 weeks experience shoulder pain?	1, Yes		comorshoul_p0		x
	In addition to LBP, did you within the last 2 weeks experience pain in the elbows?	1, Yes		comorelbow_p0		x
	In addition to LBP, did you within the last 2 weeks experience pain in the arms?	1, Yes		comorarms_p0		x
	In addition to LBP, did you within the last 2 weeks experience pain in the hands?	1, Yes		comorhand_p0		x
	In addition to LBP, did you within the last 2 weeks experience hip pain?	1, Yes		comorhip_p0		x
	In addition to LBP, did you within the last 2 weeks experience knee pain?	1, Yes		comorknee_p0		x
	In addition to LBP, did you within the last 2 weeks experience leg pain?	1, Yes		comorlegs_p0		x
	In addition to LBP, did you within the last 2 weeks experience pain in the feet?	1, Yes		comorfeet_p0		x
	In addition to LBP, did you within the last 2 weeks experience pain anywhere else?	1, Yes		comorother_p0		x
	I have not experienced pain	1, Yes		comorno_p0		x				Recoded as missing if any other comro-variable=1
	Did a doctor ever tell you that you have or have had diabetes?	1, Yes		diadia_p0		x
	Did a doctor ever tell you that you have or have had osteoporosis?	1, Yes		diaosteo_p0		x
	Did a doctor ever tell you that you have or have had thrombus in the hearth, brain or somewhere else?	1, Yes		diaclot_p0		x
	Did a doctor ever tell you that you have or have had hypertension?	1, Yes		diahyper_p0		x
	Did a doctor ever tell you that you have or have had psoriasis?	1, Yes		diapsor_p0		x
	Did a doctor ever tell you that you have or have had rheumatoid arthritis?	1, Yes		diarhart_p0		x
	Did a doctor ever tell you that you have or have had osteoarthritis?	1, Yes		diaarth_p0		x
	Did a doctor ever tell you that you have or have had fibromyalgia?	1, Yes		diafib_p0		x
	Did a doctor ever tell you that you have or have had metabolic diseases (too high or too low metabolism)?	1, Yes		diameta_p0		x
	Did a doctor ever tell you that you have or have had asthma?	1, Yes		diaast_p0		x
	Did a doctor ever tell you that you have or have had migraine?	1, Yes		diamig_p0		x
	Did a doctor ever tell you that you have or have had chronic inflammatory bowel disease (Crohn's disease)?	1, Yes		diacrohn_p0		x
	Did a doctor ever tell you that you have or have had cancer?	1, Yes		diacan_p0		x
	Did a doctor ever tell you that you have or have had COPD or chronic bronchitis?	1, Yes		diakol_p0		x
	Did a doctor ever tell you that you have or have had a neurological disease (e.g. sclerosis or Parkinson's disease)?	1, Yes		dianeuro_p0		x
	None of the diseases mentioned	1, Yes		dianone_p0		x				Recoded as missing if any other dia-variable=1
Pain and LBP history	Within the last week, how strong have your low back pain typically been on a scale from 0 to 10?	0, None 0 | 1, 1 | 2, 2 | 3, 3 | 4, 4 | 5, 5 | 6, 6 | 7, 7 | 8, 8 | 9, 9 | 10, Worst imaginable 10		backpain_p0	x		x	x, i	x, i	Interview data merged with questionnaire data
	Within the last week, how strong have your leg pain typically been on a scale from 0 to 10?	0, None 0 | 1, 1 | 2, 2 | 3, 3 | 4, 4 | 5, 5 | 6, 6 | 7, 7 | 8, 8 | 9, 9 | 10, Worst imaginable 10		legpain_p0	x		x	x, i	x, i	Interview data merged with questionnaire data
	How long has it been since the current pain began?	1, 1 - 2 days | 2, 3 - 7 days | 3, 1 - 2 weeks | 4, 2 - 4 weeks | 5, 1 - 3 months | 6, 3 - 12 months | 7, More than 1 year		epidur_p0	x
	Below some examples of how low back pain course may be are shown: Tick the box next to the description that best suits your course over the past year	1, A: No low back pain before now or a single limited episode of pain. | 2, B: Episodes with low back pain with painless periods of at least 1 month in between. | 3, C: Rather mild back pain most of the time. | 4, D: Rather severe low back pain for most of the time 5, E: Pain of varying severity, generally mild 6, F: Pain of varying severity, generally severe | 7, G: Pain of varying severity, cha…		trajec_p0		x			x
	Please describe your back pain over the last year:			trajecno_p0		x			x	Item skipped unless trajec_p0="8, X".
	How many episodes of low back pain have you had before this?	0, None | 1, 1 episode | 2, 2 - 3 episodes | 3, More than 3 episodes		prevepi_p0		x
	How many days with back pain have you had in the last year?	1, 30 days or less in total | 2, More than 30 dagys in total		paindays_p0		x
	The pain began in connection to: A heavy lift	1, Yes		trig1_p0		x
	The pain began in connection to: An awkward position	1, Yes		trig2_p0		x
	The pain began in connection to: Handling something too far from the body	1, Yes		trig3_p0		x
	The pain began in connection to: Slippery surface or poor balance	1, Yes		trig4_p0		x
	The pain began in connection to: Moderate physical activity walking cooking, moderate cycling or the like)	1, Yes		trig5_p0		x
	The pain began in connection to: Heavy physical activity (heavy gardening, sports, hard work)	1, Yes		trig6_p0		x
	The pain began in connection to: Alcohol consumption	1, Yes		trig7_p0		x
	The pain began in connection to: Got distracted while I was doing a task / an activity	1, Yes		trig8_p0		x
	The pain began in connection to: Tiredness	1, Yes		trig9_p0		x
	The pain began in connection to: Other	1, Yes		trig10_p0		x
	Did you previously have radiography, CT scan or MRI scan done because of your back?	0, No | 1, Yes		previmage_p0	x
	Have you been seeing other practitioners for your present low back pain?	0, No | 1, Yes		otherprac_p0		x
	GP (other practitioner seen for present pain episode)	0, No | 1, Yes		otherprac_gp_p0		x				Item skipped unless otherprac_p0="1, Yes". Recoded as "0, No" if otherprac_p0="0, No". Missings recoded as "0, No" if otherprac_p0="1, Yes" unless all sub-items (_gp_, _chiro_, _phys_, _other_) were missing.
	Other chiropractor (other practitioner seen for present pain episode)	0, No | 1, Yes		otherprac_chiro_p0		x				Item skipped unless otherprac_p0="1, Yes". Recoded as "0, No" if otherprac_p0="0, No". Missings recoded as "0, No" if otherprac_p0="1, Yes" unless all sub-items (_gp_, _chiro_, _phys_, _other_) were missing.
	Physiotherapist (other practitioner seen for present pain episode)	0, No | 1, Yes		otherprac_phys_p0		x				Item skipped unless otherprac_p0="1, Yes". Recoded as "0, No" if otherprac_p0="0, No". Missings recoded as "0, No" if otherprac_p0="1, Yes" unless all sub-items (_gp_, _chiro_, _phys_, _other_) were missing.
	Other practitioner (other practitioner seen for present pain episode)	0, No | 1, Yes		otherprac_other_p0		x				Item skipped unless otherprac_p0="1, Yes". Recoded as "0, No" if otherprac_p0="0, No". Missings recoded as "0, No" if otherprac_p0="1, Yes" unless all sub-items (_gp_, _chiro_, _phys_, _other_) were missing.
	Which other practitioner (other practitioner seen for present pain episode)			otherpracwho_p0		x				Item skipped unless otherprac_other_p0="1, Yes".
	Have you had previous surgery due to back problems?	0, No | 1, Yes		prevsurg_p0		x
	Have you previously received treatment for low back pain?	0, No | 1, Yes		prevtreat_p0		x
	GP (previous treatment for back pain)	0, No | 1, Yes		prevtreat_gp_p0		x				Item skipped unless prevtreat_p0="1, Yes". Recoded as "0, No" if prevtreat_p0="0, No". Missings recoded as "0, No" if prevtreat_p0="1, Yes" unless all sub-items (_gp_, _chiro_, _phys_, _other_) were missing.
	Other chiropractor (previous treatment for back pain)	0, No | 1, Yes		prevtreat_chiro_p0		x				Item skipped unless prevtreat_p0="1, Yes". Recoded as "0, No" if prevtreat_p0="0, No". Missings recoded as "0, No" if prevtreat_p0="1, Yes" unless all sub-items (_gp_, _chiro_, _phys_, _other_) were missing.
	Physiotherapist (previous treatment for back pain)	0, No | 1, Yes		prevtreat_phys_p0		x				Item skipped unless prevtreat_p0="1, Yes". Recoded as "0, No" if prevtreat_p0="0, No". Missings recoded as "0, No" if prevtreat_p0="1, Yes" unless all sub-items (_gp_, _chiro_, _phys_, _other_) were missing.
	Other practitioner (previous treatment for back pain)	0, No | 1, Yes		prevtreat_other_p0		x				Item skipped unless prevtreat_p0="1, Yes". Recoded as "0, No" if prevtreat_p0="0, No". Missings recoded as "0, No" if prevtreat_p0="1, Yes" unless all sub-items (_gp_, _chiro_, _phys_, _other_) were missing.
	Which other practitioner (previous treatment for back pain)			prevtreatwho_p0		x				Item skipped unless prevtreat_other_p0="1, Yes".
	Do you currently take medication for your low back pain?	0, No | 1, Yes, prescription medication | 2, Ja, non-prescription medication		med_p0		x	x	x, i	x, i	Interview data merged with questionnaire data
Consulation Expectations	Expectation to consultation: I will be thoroughly examined	1, Yes		chiroexp1_p0	x
	Expectation to consultation: I'll get to know what is wrong	1, Yes		chiroexp2_p0	x
	Expectation to consultation: Radiography or MRI will be made (or I'll be referred to it)	1, Yes		chiroexp3_p0	x
	Expectation to consultation:I'll get to know how long time my backpain will continue	1, Yes		chiroexp4_p0	x
	Expectation to consultation: I'll get treatment that can relieve my pain	1, Yes		chiroexp5_p0	x
	Expectation to consultation: The chiropractor will listen to my concerns	1, Yes		chiroexp6_p0	x
	Expectation to consultation: I'll get advice as to what I can do myself	1, Yes		chiroexp7_p0	x
	Expectation to consultation: The chiropractor will discuss diet, exercise and smoking with me	1, Yes		chiroexp8_p0	x
	Expectation to consultation: I will be instructed in exercises or advised about training	1, Yes		chiroexp9_p0	x
	Expectation to consultation: I'll get advice in relation to my work / my education	1, Yes		chiroexp10_p0	x
	Expectation to consultation: I'll get a notification of illness	1, Yes		chiroexp11_p0	x
	Expectation to consultation: I'll get help to cope with the pain	1, Yes		chiroexp12_p0	x
	Expectation to consultation: The chiropractor will discuss various treatment options with me	1, Yes		chiroexp13_p0	x
	Expectation to consultation: Other	1, Yes		chiroexp14_p0	x
	Please describe other expectations	text		chiroexp15tx_p0	x					Item skipped unless chiroexp14_p0="1, Yes".
Reassurance	CRQ Data-gathering SUM Score	Calculated score: Range 0-18	Subscale of Consultation-based reassurance questionnaire (CRQ) (ref)*	crq_data_sumscore		x				Calculated field, using imputed values
	CRQ Relationship-building SUM Score	Calculated score: Range 0-18	Subscale CRQ	crq_rel_sumscore		x				Calculated field, using imputed values
	CRQ General reassurance SUM Score	Calculated score: Range 0-18	Subscale CRQ	crq_gen_sumscore		x				Calculated field, using imputed values
	CRQ Cognitive reassurance SUM Score	Calculated score: Range 0-18	Subscale CRQ	crq_cog_sumscore		x				Calculated field, using imputed values
	To what extent did the chiropractor: Tell you that everything would be fine	0, Not at all |1 | 2, | 3, | 4, | 5, | 6, Very much	CRQ 1	crq1_p0		x
	To what extent did the chiropractor: Show that he/she understood your concerns	0, Not at all |1 | 2, | 3, | 4, | 5, | 6, Very much	CRQ 2	crq2_p0		x
	To what extent did the chiropractor: Reassure you that he/she had no serious concerns about your back	0, Not at all |1 | 2, | 3, | 4, | 5, | 6, Very much	CRQ 3	crq3_p0		x
	To what extent did the chiropractor: Explain how the treatment offered would help with your problem	0, Not at all |1 | 2, | 3, | 4, | 5, | 6, Very much	CRQ 4	crq4_p0		x
	To what extent did the chiropractor: Tell you that you should not be worried	0, Not at all |1 | 2, | 3, | 4, | 5, | 6, Very much	CRQ 5	crq5_p0		x
	To what extent did the chiropractor: Listen attentively while you were talking	0, Not at all |1 | 2, | 3, | 4, | 5, | 6, Very much	CRQ 6	crq6_p0		x
	To what extent did the chiropractor: Make sure you understood what your treatment plan involves	0, Not at all |1 | 2, | 3, | 4, | 5, | 6, Very much	CRQ 7	crq7_p0		x
	To what extent did the chiropractor: Put you at ease	0, Not at all |1 | 2, | 3, | 4, | 5, | 6, Very much	CRQ 8	crq8_p0		x
	To what extent did the chiropractor: Summarise what you had told them	0, Not at all |1 | 2, | 3, | 4, | 5, | 6, Very much	CRQ 9	crq9_p0		x
	To what extent did the chiropractor: Show a genuine interest in your problem	0, Not at all |1 | 2, | 3, | 4, | 5, | 6, Very much	CRQ 10	crq10_p0		x
	To what extent did the chiropractor: Encourage you to voice your concerns regarding your symptoms	0, Not at all |1 | 2, | 3, | 4, | 5, | 6, Very much	CRQ 11	crq11_p0		x
	To what extent did the chiropractor: Check you understood the explanation he/she gave for your symptoms	0, Not at all |1 | 2, | 3, | 4, | 5, | 6, Very much	CRQ 12	crq12_p0		x
Psychological factors	Given an average day, how big are your chances for handling or controlling your pain?	0, No chance | 1, 1 | 2, 2 | 3, 3 | 4, 4 | 5, 5 | 6, 6 | 7, 7 | 8, 8 | 9, 9 | 10, Complete control	Örebro ÖMPQ Danish Item 10 (ref)	ompq10dk_p0	x		x	x, i	x, i	Interview data merged with questionnaire data
	How certain are you that you will be able to return to ALL of your usual activities 1 month from today?	0, Not certain at all | 1, 1 | 2, 2 | 3, 3 | 4, 4 | 5, 5 | 6, 6 | 7, 7 | 8, 8 | 9, 9 | 10, Completely certain		fullact_p0	x
	In your view, how large is the risk that your current pain may become persistent?	0, No risk | 1, 1 | 2, 2 | 3, 3 | 4, 4 | 5, 5 | 6, 6 | 7, 7 | 8, 8 | 9, 9 | 10, Very large risk	Örebro ÖMPQ Danish Item 13 (ref)	ompq13dk_p0	x
	In your estimation, what are the chances you will be working your normal duties in 3 months?	0, No chance 0 | 1, 1 | 2, 2 | 3, 3 | 4, 4 | 5, 5 | 6, 6 | 7, 7 | 8, 8 | 9, 9 | 10, Very large chance 10	Örebro ÖMPSQ (short form) Item 8 (ref)	ompqshort8_p0	x
	How much have you been bothered by feeling depressed in the past week?	0, Not at all 0 | 1, 1 | 2, 2 | 3, 3 | 4, 4 | 5, 5 | 6, 6 | 7, 7 | 8, 8 | 9, 9 | 10, Extremely 10	Örebro ÖMPQ Danish Item 12	ompq12dk_p0	x		x	x	x
	How tense or anxious have you felt in the past week?	0, Absolutely calm 0 | 1, 1 | 2, 2 | 3, 3 | 4, 4 | 5, 5 | 6, 6 | 7, 7 | 8, 8 | 9, 9 | 10, Very tense 10	Örebro ÖMPQ Danish Item 11	ompq11dk_p0	x		x	x	x
	FABQ Work SUM Score	Calulated sum Range 0-42	Fear Avoidance Beliefs Questionnaire (FABQ), Work scale (ref)	fabq_work	x					Calculated field, using imputed values. Skipped unless job_p0="1, Yes"
	My pain was caused by my work or by an accident at work	0, Complete disagree 0 | 1, 1 | 2, 2 | 3, Unsure 3 | 4, 4 | 5, 5 | 6, Complete agree 6	FABQ 6	fabq6_p0	x					Item skipped unless job_p0="1, Yes". Recoded as ".a" if job_p0="0, No"
	My work aggravated my pain	0, Complete disagree 0 | 1, 1 | 2, 2 | 3, Unsure 3 | 4, 4 | 5, 5 | 6, Complete agree 6	FABQ 7	fabq7_p0	x					Item skipped unless job_p0="1, Yes". Recoded as ".a" if job_p0="0, No"
	My work is too heavy for me	0, Complete disagree 0 | 1, 1 | 2, 2 | 3, Unsure 3 | 4, 4 | 5, 5 | 6, Complete agree 6	FABQ 9	fabq9_p0	x					Item skipped unless job_p0="1, Yes". Recoded as ".a" if job_p0="0, No"
	My work makes or would make my pain worse	0, Complete disagree 0 | 1, 1 | 2, 2 | 3, Unsure 3 | 4, 4 | 5, 5 | 6, Complete agree 6	FABQ 10	fabq10_p0	x					Item skipped unless job_p0="1, Yes". Recoded as ".a" if job_p0="0, No"
	My work might harm by back	0, Complete disagree 0 | 1, 1 | 2, 2 | 3, Unsure 3 | 4, 4 | 5, 5 | 6, Complete agree 6	FABQ 11	fabq11_p0	x					Item skipped unless job_p0="1, Yes". Recoded as ".a" if job_p0="0, No"
	I should not do my normal work with my present pain	0, Complete disagree 0 | 1, 1 | 2, 2 | 3, Unsure 3 | 4, 4 | 5, 5 | 6, Complete agree 6	FABQ 12	fabq12_p0	x					Item skipped unless job_p0="1, Yes". Recoded as ".a" if job_p0="0, No"
	I do not think that I will be back to my normal work within 3 months	0, Complete disagree 0 | 1, 1 | 2, 2 | 3, Unsure 3 | 4, 4 | 5, 5 | 6, Complete agree 6	FABQ 15	fabq15_p0	x					Item skipped unless job_p0="1, Yes". Recoded as ".a" if job_p0="0, No"
	I’m afraid that I might injury myself if I exercise	1, Strongly disagree | 2, Disagree | 3, Agree | 4, Strongly agree	Tampa Scale of Kinesiophobia (TSK) (ref)	tampa1_p0	x
	Pain always means I have injured my body	1, Strongly disagree | 2, Disagree | 3, Agree | 4, Strongly agree	TSK	tampa7_p0	x
Ilness perceptions	1. Please rank the three most important factors that you believe caused your back pain	text	Ilness Perception Questionnaire (ref)	ipq_cause1_p0	x				x
	2. Please rank the three most important factors that you believe caused your back pain	text	Ilness Perception Questionnaire	ipq_cause2_p0	x				x
	3. Please rank the three most important factors that you believe caused your back pain	text	Ilness Perception Questionnaire	ipq_cause3_p0	x				x
	BBQ SUM Score	Calculated sum: Range 9-45	Back Beliefs Qusetionnaire (BBQ) Score (ref)*	bbqsumscore	x			x	x	Calculated field, using imputed values. Follow-ups not imputed for nonresponders and interview only.
	There is no real treatment for back trouble	1, Completely disagree 1 | 2, 2 | 3, 3 | 4, 4 | 5, Completely agree 5	BBQ 1	bbq15_p0	x			x	x
	Back trouble will eventually stop you from working	1, Completely disagree 1 | 2, 2 | 3, 3 | 4, 4 | 5, Completely agree 5	BBQ 2	bbq16_p0	x			x	x
	Back trouble means periods of pain for the rest of one’s life	1, Completely disagree 1 | 2, 2 | 3, 3 | 4, 4 | 5, Completely agree 5	BBQ 3	bbq17_p0	x			x	x
	Doctors cannot do anything for back trouble	1, Completely disagree 1 | 2, 2 | 3, 3 | 4, 4 | 5, Completely agree 5	BBQ 4	bbq18_p0	x			x	x
	A bad back should be exercised	1, Completely disagree 1 | 2, 2 | 3, 3 | 4, 4 | 5, Completely agree 5	BBQ 5	bbq19_p0	x			x	x
	Back trouble makes everything in life worse	1, Completely disagree 1 | 2, 2 | 3, 3 | 4, 4 | 5, Completely agree 5	BBQ 6	bbq20_p0	x			x	x
	Surgery is the most effective way to treat back trouble	1, Completely disagree 1 | 2, 2 | 3, 3 | 4, 4 | 5, Completely agree 5	BBQ 7	bbq21_p0	x			x	x
	Back trouble may mean you will end up in a wheelchair	1, Completely disagree 1 | 2, 2 | 3, 3 | 4, 4 | 5, Completely agree 5	BBQ 8	bbq22_p0	x			x	x
	Alternative treatments are the answer to back trouble	1, Completely disagree 1 | 2, 2 | 3, 3 | 4, 4 | 5, Completely agree 5	BBQ 9	bbq23_p0	x			x	x
	Back trouble means long periods of time off work	1, Completely disagree 1 | 2, 2 | 3, 3 | 4, 4 | 5, Completely agree 5	BBQ 10	bbq24_p0	x			x	x
	Medication is the only way of relieving back trouble	1, Completely disagree 1 | 2, 2 | 3, 3 | 4, 4 | 5, Completely agree 5	BBQ 11	bbq25_p0	x			x	x
	Once you have had back trouble there is always a weakness	1, Completely disagree 1 | 2, 2 | 3, 3 | 4, 4 | 5, Completely agree 5	BBQ 12	bbq26_p0	x			x	x
	Back trouble must be rested	1, Completely disagree 1 | 2, 2 | 3, 3 | 4, 4 | 5, Completely agree 5	BBQ 13	bbq27_p0	x			x	x
	Later in life back trouble gets progressively worse	1, Completely disagree 1 | 2, 2 | 3, 3 | 4, 4 | 5, Completely agree 5	BBQ 14	bbq28_p0	x			x	x
	X-rays or scans are necessary to get the best medical care for low back pain	1, Completely disagree 1 | 2, 2 | 3, 3 | 4, 4 | 5, Completely agree 5	From (ref)*	imagepow1_p0	x				x
	Everyone with low back pain should have spine imaging (e.g X-ray, CT or MRI)	1, Completely disagree 1 | 2, 2 | 3, 3 | 4, 4 | 5, Completely agree 5	From (ref)*	imagepow2_p0	x				x
Physical function	RMDQ SUM Score	Calculated score: Range 1-100	Roland Morris Disability Qustionnaire (RMDQ) (ref)	rmdq_sumscore	x		x	x	x	Calculated field, using imputed values. Follow-ups not imputed for nonresponders and interview only.
	1. I stay at home most of the time because of my back.	0, No | 1, Yes	RMDQ 1	rm1_p0	x		x	x	x
	2. I change position frequently to try and get my back comfortable.	0, No | 1, Yes	RMDQ 2	rm2_p0	x		x	x	x
	3. I walk more slowly than usual because of my back.	0, No | 1, Yes	RMDQ 3	rm3_p0	x		x	x	x
	4. Because of my back I am not doing any of the jobs that I usually do around the house.	0, No | 1, Yes	RMDQ 4	rm4_p0	x		x	x	x
	5. Because of my back, I use a handrail to get upstairs.	0, No | 1, Yes	RMDQ 5	rm5_p0	x		x	x	x
	6. Because of my back, I have to hold on to something to get out of an easy chair.	0, No | 1, Yes	RMDQ 6	rm6_p0	x		x	x	x
	7. I get dressed more slowly then usual because of my back.	0, No | 1, Yes	RMDQ 7	rm7_p0	x		x	x	x
	8. I only stand up for short periods of time because of my back.	0, No | 1, Yes	RMDQ 8	rm8_p0	x		x	x	x
	9. Because of my back, I try not to bend or kneel down.	0, No | 1, Yes	RMDQ 9	rm9_p0	x		x	x	x
	10. I find it difficult to get out of a chair because of my back.	0, No | 1, Yes	RMDQ 10	rm10_p0	x		x	x	x
	11. My back is painful almost all the time.	0, No | 1, Yes	RMDQ 11	rm11_p0	x		x	x	x
	12. I find it difficult to turn over in bed because of my back.	0, No | 1, Yes	RMDQ 12	rm12_p0	x		x	x	x
	13. I have trouble putting on my socks (or stockings) because of the pain in my back.	0, No | 1, Yes	RMDQ 13	rm13_p0	x		x	x	x
	14. I can only walk short distances because of my back.	0, No | 1, Yes	RMDQ 14	rm14_p0	x		x	x	x
	15. I sleep less well because of my back.	0, No | 1, Yes	RMDQ 15	rm15_p0	x		x	x	x
	16. I avoid heavy jobs around the house because of my back.	0, No | 1, Yes	RMDQ 16	rm16_p0	x		x	x	x
	18. Because of my back pain, I am more irritable and bad tempered with people than usual.	0, No | 1, Yes	RMDQ 17	rm17_p0	x		x	x	x
	17. Because of my back, I go upstairs more slowly than usual.	0, No | 1, Yes	RMDQ 18	rm18_p0	x		x	x	x
	19. I stay in bed most of the time because of my back.	0, No | 1, Yes	RMDQ 19	rm19_p0	x		x	x	x
	20. Because of my back pain, my sexual activity has decreased	0, No | 1, Yes	RMDQ 20	rm20_p0	x		x	x	x
	21. I keep rubbing or holding the parts of my body that hurts or is irritated	0, No | 1, Yes	RMDQ 21	rm21_p0	x		x	x	x
	22. Because of my back pain, I do less of the daily work around the houso than usual	0, No | 1, Yes	RMDQ 22	rm22_p0	x		x	x	x
	23. I often express concern to other people about what may be happening to my health	0, No | 1, Yes	RMDQ 23	rm23_p0	x		x	x	x
	Physical fitness (how much you can do without becoming short of breath)	1, Poor | 2, | 3, | 4, | 5, Middle | 6, | 7, | 8, | 9, Super	Self-assessed physical fitness using visual analogue scales (ref)	physkon_p0		x			x
	Strength (how much you can lift, carry, push)	1, Weak | 2, | 3, | 4, | 5, Middle | 6, | 7, | 8, | 9, Strong	Self-assessed physical fitness using visual analogue scales	physsty_p0		x			x
	Endurance (how long time you can do something physically demanding)	1, poor | 2, | 3, | 4, | 5, Middle | 6, | 7, | 8, | 9, Good	Self-assessed physical fitness using visual analogue scales	physudh_p0		x			x
	Flexibility (how lithe or flexible you are)	1, Stiff | 2, | 3, | 4, | 5, Middle | 6, | 7, | 8, | 9, Lithe	Self-assessed physical fitness using visual analogue scales	physbev_p0		x			x
	Balance (how good you are to stand on one leg or walk a line)	1, Poor | 2, | 3, | 4, | 5, Middle | 6, | 7, | 8, | 9, Good	Self-assessed physical fitness using visual analogue scales	physbal_p0		x			x
Prognostic index	START back risk	Calculated categories: 1, low | 2, medium | 3, high	START Classification (ref)	sbt_risk	x		x	x		Calculated field, using imputed values: Follow-ups not imputed for nonresponders and interview only.
	My back pain has spread down my leg(s) at some time in the last 2 weeks	0, No | 1, Yes	START 1	start1_p0	x		x	x
	I have had pain in the shoulder or neck at some time in the last 2 weeks	0, No | 1, Yes	START 2	start2_p0	x		x	x
	I have only walked short distances because of my back pain	0, No | 1, Yes	START 3	start3_p0	x		x	x
	In the last 2 weeks, I have dressed more slowly than usual because of back pain	0, No | 1, Yes	START 4	start4_p0	x		x	x
	It’s not really safe for a person with a condition like mine to be physically active	0, No | 1, Yes	START 5	start5_p0	x		x	x
	Worrying thoughts have been going through my mind a lot of the time	0, No | 1, Yes	START 6	start6_p0	x		x	x
	I feel that my back pain is terrible and it’s never going to get any better	0, No | 1, Yes	START 7	start7_p0	x		x	x
	In general I have not enjoyed all the things I used to enjoy	0, No | 1, Yes	START 8	start8_p0	x		x	x
	Overall, how bothersome has your back pain been in the last 2 weeks?	1, Not at all | 2, Slightly | 3, Moderately | 4, Very much | 5, Extremely	START 9	start9_p0	x		x	x
Treatment during follow-up	Have you been seeing other practitioners than the chiropractor for low back pain within the last 2 weeks?	0, No | 1, Yes		otherprac_p2			x
	GP (other practitioner seen within last 2 weeks)	0, No | 1, Yes		otherprac_gp_p2			x			Item skipped unless otherprac_p2="1, Yes". Recoded as "0, No" if otherprac_p2="0, No". Missings recoded as "0, No" if otherprac_p2="1, Yes" unless all sub-items (_gp_, _chiro_, _phys_, _other_) were missing.
	Physiotherapist (other practitioner seen within last 2 weeks)	0, No | 1, Yes		otherprac_phys_p2			x			Item skipped unless otherprac_p2="1, Yes". Recoded as "0, No" if otherprac_p2="0, No". Missings recoded as "0, No" if otherprac_p2="1, Yes" unless all sub-items (_gp_, _chiro_, _phys_, _other_) were missing.
	Other practitioner (other practitioner seen within last 2 weeks)	0, No | 1, Yes		otherprac_other_p2			x			Item skipped unless otherprac_p2="1, Yes". Recoded as "0, No" if otherprac_p2="0, No". Missings recoded as "0, No" if otherprac_p2="1, Yes" unless all sub-items (_gp_, _chiro_, _phys_, _other_) were missing.
	Which other practitioner (other practitioner seen within last 2 weeks)			otherpracwho_p2			x			Item skipped unless otherprac_other_p2="1, Yes".
	How many times have you been seeing another practitioner within the last 2 weeks?	1, Once | 2, 2-4 times| 3, More than 4 times		numberotherprac_p2			x			Item skipped unless otherprac_p2="1, Yes". Recoded as "0, No" if otherprac_p2="0, No"
	Did you receive treatment for low back pain within the last month?	0, No | 1, Yes		treat1m_p13				x, i	x, i	Interview data merged with questionnaire data
	Chiropractor (treatment within last month)	0, No | 1, Yes		treat1m_chiro_p13				x, i	x, i	Interview data merged with questionnaire data. Item skipped unless treat1m_p13="1, Yes". Recoded as "0, No" if treat1m_p13="0, No". Missings recoded as "0, No" if treat1m_p13="1, Yes" unless all sub-items (_gp_, _chiro_, _phys_, _other_) were missing.
	GP (treatment within last month)	0, No | 1, Yes		treat1m_gp_p13				x, i	x, i	Interview data merged with questionnaire data. Item skipped unless treat1m_p13="1, Yes". Recoded as "0, No" if treat1m_p13="0, No". Missings recoded as "0, No" if treat1m_p13="1, Yes" unless all sub-items (_gp_, _chiro_, _phys_, _other_) were missing.
	Physiotherapist (treatment within last month)	0, No | 1, Yes		treat1m_phys_p13				x, i	x, i	Interview data merged with questionnaire data. Item skipped unless treat1m_p13="1, Yes". Recoded as "0, No" if treat1m_p13="0, No". Missings recoded as "0, No" if treat1m_p13="1, Yes" unless all sub-items (_gp_, _chiro_, _phys_, _other_) were missing.
	Other practitioner (treatment within last month)	0, No | 1, Yes		treat1m_other_p13				x, i	x, i	Interview data merged with questionnaire data. Item skipped unless treat1m_p13="1, Yes". Recoded as "0, No" if treat1m_p13="0, No". Missings recoded as "0, No" if treat1m_p13="1, Yes" unless all sub-items (_gp_, _chiro_, _phys_, _other_) were missing.
	Which other practitioner (treatment within last month)			otherpracwho_p13				x	x	Item skipped unless treat1m_other_p13="1, Yes".
	How many times have you been seeing your chiropractor within the last 2 weeks?	1, Once | 2, 2-4 times| 3, More than 4 times		numbertreat1m_chiro_p13				x	x	Item skipped unless treat1m_chiro_p="1, Yes". Recoded as "0" if treat1m_p="0, No". Recoded as "0" if treat1m_p="1" & treat1m_chiro_p=missing provided treat1_other is not missing. Due to question being added 24 Nov. 2017 recoded as ".a2" if treat1m_p responded with "1, Yes" prior to that date.
	How many times have you been seeing other practitioners than your chiropractor within the last 2 weeks?	1, Once | 2, 2-4 times| 3, More than 4 times		numbertreat1m_others_p13				x	x	Item skipped unless treat1m_other_p="1, Yes". Recoded as "0" if treat1m_p="0, No". Recoded as "0" if treat1m_p="1" & treat1m_other_p=missing provided treat1_chiro is not missing. Due to question being added 24 Nov. 2017 recoded as ".a2" if treat1m_p responded with "1, Yes" prior to that date.
Additional outcome measures	How many days have you had back pain (or leg pain stemming from the back) the last 7 days? (please answer with one number between 0 and 7)	0,1,2,3,4,5,6,7	SMS-track	lbpdays##	x	x	x	x	x	See document "Principles of SMS clearing"
	How severe was the pain on a scale from 0 to 10?	0,1,2,3,4,5,6,7,8,9,10	SMS-track	painlevel##	x	x	x	x	x	See document "Principles of SMS clearing"
	How many days have you been home from work or study last week because of your back pain? (please answer with one number between 0 and 7)	0,1,2,3,4,5,6,7	SMS-track	sickdays##	x	x	x	x	x	See document "Principles of SMS clearing"
	All in all are you satisfied with the treatment course at the chiropractor?	1, To a very high degree | 2, To a high degree | 3, To some degree | 4, To a limited degree | 5, Not at all | 6, Dont know		satis_p2			x
	How would you describe your general low back (and possibly leg) condition now compared to how you felt 2 weeks ago?	1, Much better | 2, Better | 3, Sligthly better | 4, Almost the same | 5, Slightly worse | 6, Worse | 7, Much worse	Global perceived effect (ref)	gpc_p2			x
	Has your understanding of your low back pain changed since you saw a chiropractor (when you started the project)?	1, Not changed at all | 2, Hardly changed | 3, Changed slightly | 4, Completely changed | 5, Dont know		understand_p2			x
	Do you think getting an explanation for your low back pain helped you deal with your low back pain?	0, No | 1, Yes | 2, Dont know | 3, I didn't get an explanation		explain_p2			x
	Overall, has your back problem over the past half year:	1, become better | 2, largely unchanged | 3, become worse		trajecchange_p52					x
	Radiography: (within last year)	1, Yes | 0, No | 9, Dont know		imagely_radio_p52					x
	MR scan: (within last year)	1, Yes | 0, No | 9, Dont know		imagely_mr_p52					x
	CT- scan: (within last year)	1, Yes | 0, No | 9, Dont know		imagely_ct_p52					x
* Questionaires translated to Danish for use in the cohort. conducted as recommended by forward and back translation [ref Beaton]. The forward translation was performed by two persons with Danish as their mother tongue: A back pain researcher who is familiar with English as working language and a layperson who has a master’s degree in English Literature. After the independent translations of the …
